# Supplementary material
Source: PubMed Central journal article supplement (PMC6088501)
Supplement: Giles_Supplemental_Material_rev.pdf [file Giles_Supplemental_Material_rev.pdf]

## Supplementary Information

### Ordered Probit Model

The full model and priors are specified below. IntT, age, steering, aiming, tracking and postural balance (open and closed) scores were entered as predictors. The model was based on Kruschke (2015) and the model code is available online at <https://github.com/OscartGiles/Hitting-the-target>.

$$\boldsymbol{\beta} \sim N(0, K)$$

$$\boldsymbol{\mu} = \mathbf{X}\boldsymbol{\beta}$$

$$\mathbf{C}_1 \equiv 1.5$$

$$\mathbf{C}_{t=2,\dots,K-2} \sim N(t + 0.5, K)$$

$$\mathbf{C}_{K-1} \equiv K - 0.5$$

$$\sigma \sim \text{half Cauchy}(0, 100)$$

$$\boldsymbol{\theta}_{i,k} = \begin{cases} 1 - \phi\left(\frac{\mu_i - \mathbf{C}_1}{\sigma}\right), & k = 1 \\ \phi\left(\frac{\mu_i - \mathbf{C}_{k-1}}{\sigma}\right) - \phi\left(\frac{\mu_i - \mathbf{C}_k}{\sigma}\right), & 1 < k < K \\ \phi\left(\frac{\mu_i - \mathbf{C}_{k-1}}{\sigma}\right), & k = K \end{cases}$$

$$\mathbf{y}_i \sim \text{Categorical}(\boldsymbol{\theta}_i)$$

where  $i = 1 \dots N$ ,  $k = 1 \dots K$ , and  $t = 1 \dots K - 1$ .  $\mathbf{X}$  is an  $N \times 7$  matrix of predictor variables where the first column is equal to 1.  $\boldsymbol{\theta}$  is an  $N \times K$  matrix, specifying the probabilities of obtaining each observed academic attainment score for the  $i$ th participant.  $\phi$  is the cumulative normal function.  $\boldsymbol{\mu}$  represents a continuous latent attainment outcome, and  $\mathbf{y}$  is the observed attainment scores.

The first and last threshold value  $\mathbf{C}_1$  and  $\mathbf{C}_{K-1}$  were fixed in order to identify the model. Thus all other model parameters must be interpreted with regards to this constraint. In addition each threshold parameter was constrained to be greater than the last,  $\mathbf{C}_k < \mathbf{C}_{k+1}$ .

All priors were chosen to be weakly informative on the scale of the data

### Effect size calculations

In the main text we provide an estimate of the effect size for each predictor in the model in terms of the equivalent change in age that would be required to produce the same change on the latent attainment score as the *typical range* of each of the sensorimotor measures, where the typical range was defined as 2 times the standard deviation of the motor measure of interest. The effect size was defined as,

$$\text{Equivalent age change} = \frac{2 \times SD_j \times \beta_j}{\beta_{age}} \times 12$$

where  $SD_j$  is the estimated standard deviation for the  $j$ th sensorimotor measure (after controlling for age),  $\beta_j$  is the corresponding model coefficient and  $\beta_{age}$  is the coefficient for age. For clarity we illustrate this graphically in Figure S1 (see caption for details).

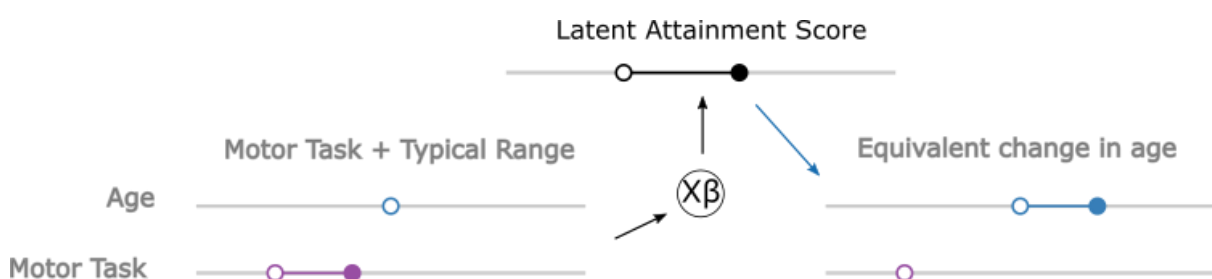

Figure S1: Illustration of how the effect size metric was calculated. The top line shows the latent Mathematics attainment score ( $\mu_i$ ) for the  $i$ th participant on a continuous scale. The model states that  $\mu_i = X_i^T \beta$ , where  $X$  is a design matrix specifying the predictor scores for each participant. As we change the values of the predictor variables, the predicted latent attainment score will change. Changing a motor task score by the *typical range* (left side; moved from open purple dot to filled

purple dot) results in a change in the predicted latent attainment score (open black dot to filled black dot). Our effect size measure defines how much we would need to change the age predictor (right side; open blue dot to closed blue dot) in order to achieve the same change in the latent attainment score. In other words, how many months the typical range of the sensorimotor task predictor is worth.

### **Typical range of sensorimotor measures after controlling for age**

We chose the *typical range* to be  $2 \times SD$  as this is the difference between a score one  $SD$  above and below the mean. We therefore needed to estimate the  $SD$  for each motor task. However, we know that a substantial proportion in the variance in each motor task is explained by age. Thus we calculated the  $SD$  after controlling for age. For a single motor task we could calculate this by fitting a simple regression with age as a predictor and the motor task as the outcome variable. The  $SD$  then provides a measure of the variance not explained by age. Here we used a “seemingly unrelated regression” model which allowed for all the motor tasks to be modelled as output variables simultaneously. This is essentially the same as fitting multiple simple regressions between age and each motor task, except that the covariance between motor tasks is also estimated. The full model code is provided at <https://github.com/OscartGiles/Hitting-the-target>.

### **Understanding how the latent attainment score maps to the observed score**

The latent attainment score is mapped to the observed data by a probit link function. For a given predicted latent attainment score ( $\mu$ ) the model provides a vector of probabilities for each possible ordered attainment outcome. For illustrative purposes, Panel a in Figure S2 shows the probability distribution when  $\mu = 5$ , which we refer to here as  $\mu_1$  (blue bars) and when  $\mu$  increases as a result of IntT increasing by the typical range, referred to as  $\mu_2$  (orange

bars). We can see that in both cases an attainment score of 5 is most probable, but in the latter case higher scores have become more probable, while the probability of lower scores has decreased. Panel b shows the logarithm of the ratio between the two probability distributions shown in Panel a. Again, this shows that observed attainment scores above 5 are more probable when the latent attainment score is increased (positive values), while lower scores are less probable (negative values).

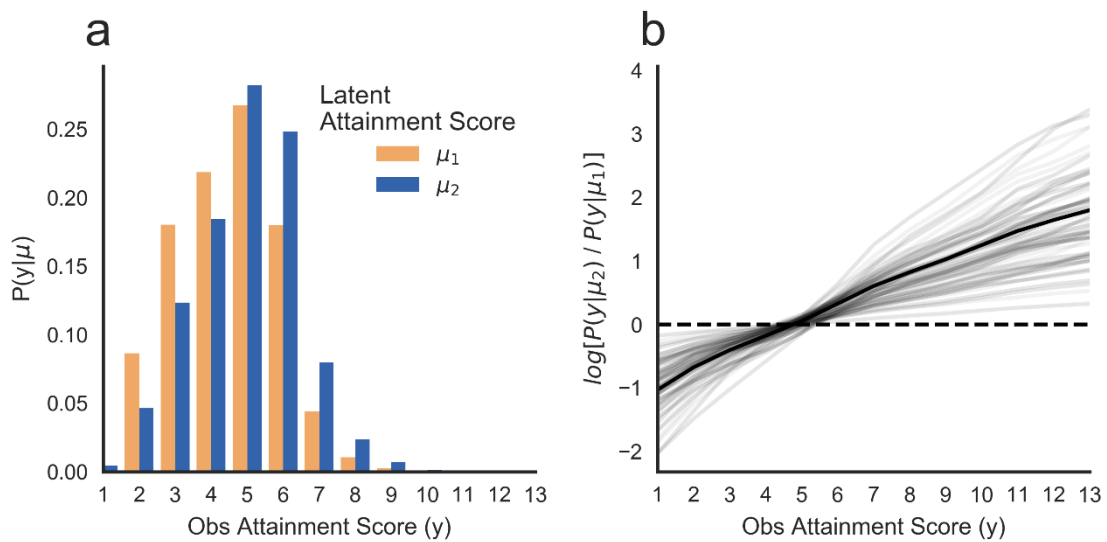

Figure S2: a) The probability of obtaining each possible observed Mathematics attainment outcome ( $y$ ) when the latent Mathematics score is equal to 5 ( $\mu_1$ ; blue bars) and when the latent Mathematics score increases by the amount induced by the typical range of the interceptive timing metric ( $\mu_2$ ; orange bars). b) Log ratio of probability of each observed Mathematics attainment score given  $\mu_1$  and  $\mu_2$ . Dark line shows the posterior mean. Other lines show 100 random samples from the posterior.

**Graphical probes of model fit – Posterior predictive checks**

To assess the how well the model captures the data we simulated 16000 data sets from the posterior ( $y_{rep}$ ) and calculated the mean and standard deviation for each. The distribution of these test statistics are shown in figure S3. The true mean and SD of the observed data is clearly plausible under the models simulations, suggesting the model captures these statistics well. We also calculated the mean score for each data point across all the expected score for each data point,  $E(y_{rep})$ . This is plotted again IntT in figure S4 (red dots) while the true Mathematics attainment scores are also plotted against IntT (blue dots). It's clear that the model captures the general pattern of observed relationship between interceptive timing and Mathematics attainment well.

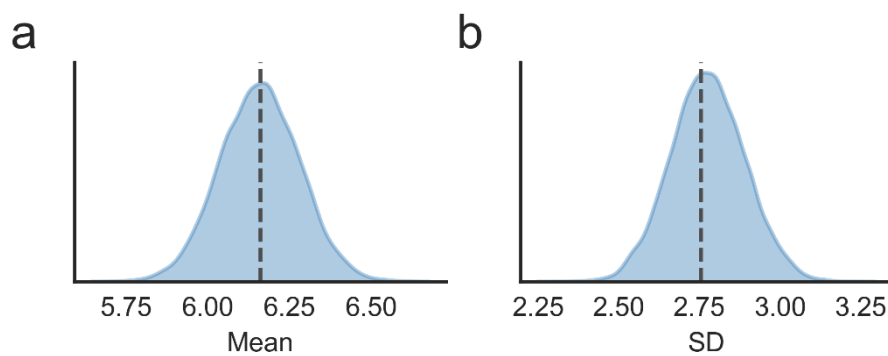

Figure S3: Distribution of test statistics for 16000 simulated data sets. a) The mean of each replicated dataset. b) The standard deviation of each replicated dataset. The distribution of simulated data is shown by the blue kernel density plots. The dashed line shows the mean and SD of the true data set.

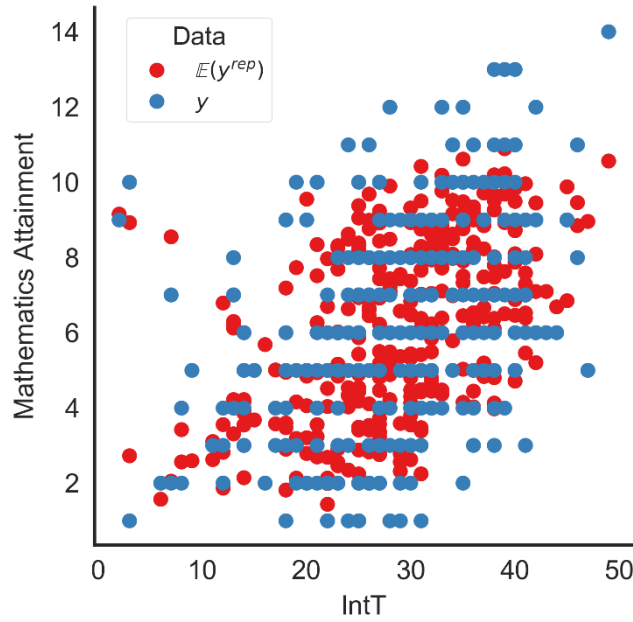

Figure S4: The expected value of the simulated data ( $y_{rep}$ ) as a function of IntT score (blue dots).  
The observed data as a function of IntT score (red dots).

**School Attainment Metrics:**

Table S1 shows how the attainment code maps to the original code used by schools, as well as the school year and age by which children are expected to reach key attainment levels.

Table S1. Attainment score conversion table. A scale of 1 to K (where K was the highest observed score in the data) was used for the Bayesian Attainment Model. This scale maps to the UK nationally standardized scores. The school year and age at which children are expected to achieve these scores is shown.

| Attainment | Government | Expected   | Expected |
|------------|------------|------------|----------|
| Score      | Code       | Year Group | Age      |

---

|    |    |   |       |
|----|----|---|-------|
| 1  | 1c |   |       |
| 2  | 1b |   |       |
| 3  | 1a |   |       |
| 4  | 2c |   |       |
| 5  | 2b | 2 | 6-7   |
| 6  | 2a |   |       |
| 7  | 3c |   |       |
| 8  | 3b |   |       |
| 9  | 3a |   |       |
| 10 | 4c |   |       |
| 11 | 4b | 6 | 10-11 |
| 12 | 4a |   |       |
| 13 | 5c |   |       |
| 14 | 5b | 9 | 13-14 |
| 15 | 5a |   |       |

---

Table S2. In UK primary schools, mathematics is taught and assessed in two stages – Key stage 1 (years 1 and 2 when the children are 4-6 years) and Key stage 2 (years 3 to 6 when the children are 7-11 years). The table below is an extracted from:

<https://www.gov.uk/government/collections/national-curriculum-assessments-test-frameworks>

|                                                                                                                                                                                                                                      | Year |                                                                                                                                            |
|--------------------------------------------------------------------------------------------------------------------------------------------------------------------------------------------------------------------------------------|------|--------------------------------------------------------------------------------------------------------------------------------------------|
| <p><a href="#">Key Stage 1</a></p> <p>The mathematics taught is very practical and related to everyday experiences. A variety of resources, such as coins, dice, dominoes, playing cards, beads and plastic bricks for counting.</p> | 1    | number bonds, early skills for multiplication and solving simple problems; very practical mathematic related to everyday experiences.      |
|                                                                                                                                                                                                                                      | 2    | working on numbers through rehearsal and using addition and subtraction facts regularly; using number lines, tracks and 100 squares.       |
| <p><a href="#">Key Stage 2</a></p> <p>Shape, space, data handling, money and measures in addition to numeracy.</p>                                                                                                                   | 3    | puzzles, problems and investigations to practice, consolidate and extend understanding with an emphasis on real world situations.          |
|                                                                                                                                                                                                                                      | 4    | decimals (particularly with money and measurement); equivalent fractions introduced via diagrams and number lines used to teach fractions. |



|                                                                                                                         |   |                                                                                                                                                                                                                                             |
|-------------------------------------------------------------------------------------------------------------------------|---|---------------------------------------------------------------------------------------------------------------------------------------------------------------------------------------------------------------------------------------------|
| Children are expected to read, write and order numbers on a number line (and place value cards, beads on a string etc). | 5 | Fractions, decimals and percentages; comparing, ordering and converting and solving problems in a meaningful context                                                                                                                        |
|                                                                                                                         | 6 | more complicated problems, including those that have decimals, fractions and percentages; expectation of working systematically, using the correct symbols and to check their results. They also learn about positive and negative numbers. |
